# Supplementary material for: Satellite-based, top-down approach for the adjustment of aerosol precursor emissions over East Asia: the TROPOspheric Monitoring Instrument (TROPOMI) NO 2 product and the Geostationary Environment Monitoring Spectrometer (GEMS) aerosol optical depth (AOD) data fusion product and its proxy
Source: Copernicus journal article supplement (doi:10.5194/amt-16-3039-2023), 2023-06-19
Supplement: Supplementary file 1 [file amt-16-3039-2023-supplement.pdf]

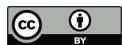

*Supplement of*

**Satellite-based, top-down approach for the adjustment of aerosol precursor emissions over East Asia: the TROPOspheric Monitoring Instrument (TROPOMI) NO<sub>2</sub> product and the Geostationary Environment Monitoring Spectrometer (GEMS) aerosol optical depth (AOD) data fusion product and its proxy**

**Jincheol Park et al.**

*Correspondence to:* Yunsoo Choi (ychoi6@uh.edu)

The copyright of individual parts of the supplement might differ from the article licence.

**Table S1. Model configurations.**

| WRF 3.8                                          |                                                                                                                 |
|--------------------------------------------------|-----------------------------------------------------------------------------------------------------------------|
| Domain                                           | East Asia on 27 km × 27 km grids                                                                                |
| Microphysics                                     | Morrison's double-moment scheme (Morrison <i>et al.</i> , 2009)                                                 |
| Longwave and shortwave radiation                 | Rapid Radiative Transfer Model for GCMs (RRTMG) (Clough <i>et al.</i> , 2005; Iacono <i>et al.</i> , 2008)      |
| Land surface                                     | Pleim-Xiu land surface model (Xiu and Pleim, 2001)                                                              |
| Surface layer                                    | Pleim-Xiu surface layer (Pleim, 2006)                                                                           |
| Planetary boundary layer                         | ACM2 planetary boundary layer model (Pleim 2007a, 2007b)                                                        |
| Cumulus parameterization                         | Kain-Fritsch (new Eta) scheme (Kain, 2004)                                                                      |
| Four-Dimensional Data Assimilation               | FDDA option for grid-nudging (Jeon <i>et al.</i> , 2015)                                                        |
| Initial and boundary conditions for meteorology  | 1° × 1° National Centers for Environmental Prediction (NCEP) FNL (final) operational model global analysis data |
| CMAQ 5.2 and CMAQ DDM-3D 5.2                     |                                                                                                                 |
| Horizontal advection                             | YAMO                                                                                                            |
| Vertical advection                               | WRF omega formula                                                                                               |
| Horizontal diffusion                             | Multiscale                                                                                                      |
| Vertical diffusion                               | ACM2 vertical diffusion scheme (Pleim 2007a, 2007b)                                                             |
| Chemical mechanism and aerosol processing module | SAPRC-07 and AERO6 (Carter, 2010; Simon, 2015)                                                                  |
| Dry deposition model                             | M3Dry (Pleim <i>et al.</i> , 2001)                                                                              |

5 **Table S2. The list of the primary PM species included the KORUS-AQ emission inventory and the corresponding pollutants simulated in CMAQ version 5.2 and measured at the Korean supersites. Note that all emissions species listed are primary, and some corresponding species include both primary and secondary forms of themselves.**

| KORUS-AQ emissions species | Corresponding CMAQ species | Corresponding Korean supersite species                                                                                                                                                              | Description                                           |
|----------------------------|----------------------------|-----------------------------------------------------------------------------------------------------------------------------------------------------------------------------------------------------|-------------------------------------------------------|
| PSO4                       | ASO4J                      | PM <sub>2.5</sub> SO <sub>4</sub>                                                                                                                                                                   | Fine mode sulfate                                     |
| PNO3                       | ANO3J                      | PM <sub>2.5</sub> NO <sub>3</sub>                                                                                                                                                                   | Fine mode nitrate                                     |
| PCL                        | ACLJ                       | PM <sub>2.5</sub> Cl                                                                                                                                                                                | Fine mode particulate chloride                        |
| PNH4                       | ANH4J                      | PM <sub>2.5</sub> NH <sub>4</sub>                                                                                                                                                                   | Fine particulate ammonium                             |
| PNA                        | ANAJ                       | PM <sub>2.5</sub> Na                                                                                                                                                                                | Fine mode sodium                                      |
| PCA                        | ACAJ                       | PM <sub>2.5</sub> Ca                                                                                                                                                                                | Fine mode calcium                                     |
| PMG                        | AMGJ                       | PM <sub>2.5</sub> Mg                                                                                                                                                                                | Fine mode magnesium                                   |
| PK                         | AKJ                        | PM <sub>2.5</sub> K                                                                                                                                                                                 | Fine mode potassium                                   |
| POC                        | APOCI, APOCJ               | PM <sub>2.5</sub> OC                                                                                                                                                                                | Fine mode primary organic carbon                      |
| PNCOM                      | APNCOMI, APNCOMJ           | -                                                                                                                                                                                                   | Fine mode primary non-carbon organic matter           |
| PEC                        | AECI, AECJ                 | PM <sub>2.5</sub> EC                                                                                                                                                                                | Fine mode elemental carbon                            |
| PFE                        | AFEJ                       | PM <sub>2.5</sub> Fe                                                                                                                                                                                | Fine mode iron                                        |
| PAL                        | AALJ                       | -                                                                                                                                                                                                   | Fine mode aluminum                                    |
| PSI                        | ASIJ                       | -                                                                                                                                                                                                   | Fine mode silicon                                     |
| PTI                        | ATIJ                       | PM <sub>2.5</sub> Ti                                                                                                                                                                                | Fine mode titanium                                    |
| PMN                        | AMNJ                       | PM <sub>2.5</sub> Mn                                                                                                                                                                                | Fine mode manganese                                   |
| PH2O                       | AH2OJ                      | -                                                                                                                                                                                                   | Fine mode particulate water                           |
| PMOTHR                     | AOTHRJ                     | PM <sub>2.5</sub> V, PM <sub>2.5</sub> Cr, PM <sub>2.5</sub> Ni, PM <sub>2.5</sub> Cu, PM <sub>2.5</sub> Zn, PM <sub>2.5</sub> As, PM <sub>2.5</sub> Se, PM <sub>2.5</sub> Br, PM <sub>2.5</sub> Pb | Remaining unspciated (undefined) fine mode primary PM |
| PMC                        | ACORS                      | -                                                                                                                                                                                                   | Coarse mode primary PM                                |

10 **Table S3. Summary statistics between the WRF-simulated hourly meteorological fields (2 m air temperatures (°C), and 10 m wind U and V components (m/s)) and ground-based in-situ measurements in Korea during the study periods 2019 (132 sites) and 2022 (95 sites). R: Pearson’s correlation coefficient, IOA: index of agreement, RMSE: root mean square error, MB: mean bias.**

|      | 2019            |        |        | 2022            |        |        |
|------|-----------------|--------|--------|-----------------|--------|--------|
|      | Air temperature | Wind U | Wind V | Air temperature | Wind U | Wind V |
| R    | 0.98            | 0.64   | 0.52   | 0.95            | 0.65   | 0.48   |
| IOA  | 0.99            | 0.74   | 0.69   | 0.96            | 0.75   | 0.66   |
| RMSE | 2.34            | 1.68   | 1.55   | 2.81            | 1.56   | 1.41   |
| MB   | -1.00           | 0.16   | -0.21  | -1.56           | 0.49   | 0.02   |

15 **Table S4. Seasonal and yearly mean NO<sub>x</sub> emissions (tons/day) before (a priori) and after (a posteriori) the NO<sub>x</sub> emissions adjustment over the modeling domain during the study period 2019. MAM: March, April, and May, JJA: June, July, and August, SON: September, October, and November, DJF: December, January, and February.**

|                               | MAM    | JJA    | SON    | DJF   | Yearly |
|-------------------------------|--------|--------|--------|-------|--------|
| A priori                      | 2.21   | 2.28   | 2.17   | 2.17  | 2.21   |
| A posteriori                  | 4.98   | 6.25   | 4.72   | 3.73  | 4.92   |
| Difference (post - prior) (%) | 125.08 | 174.16 | 117.68 | 71.64 | 122.79 |

20 **Table S5. Summary statistics of the CMAQ-simulated daily mean surface NO<sub>2</sub> concentrations (ppb) before (a priori) and after (a posteriori) the NO<sub>x</sub> emission adjustment and ground-based in-situ measurements (346 sites in Korea and 235 sites in the NCP region) during the study period 2019. R: Pearson’s correlation coefficient; NMB (%): normalized mean bias.**

|        |     | Korea    |              | NCP      |              |
|--------|-----|----------|--------------|----------|--------------|
|        |     | A priori | A posteriori | A priori | A posteriori |
| MAM    | R   | 0.66     | 0.72         | 0.75     | 0.75         |
|        | NMB | -24.20   | -5.66        | -13.90   | 12.34        |
| JJA    | R   | 0.45     | 0.63         | 0.54     | 0.52         |
|        | NMB | 15.63    | 1.83         | 5.25     | 22.32        |
| SON    | R   | 0.72     | 0.82         | 0.50     | 0.55         |
|        | NMB | -2.06    | 21.66        | -11.43   | 15.24        |
| DJF    | R   | 0.75     | 0.76         | 0.55     | 0.59         |
|        | NMB | -23.54   | 13.45        | -1.05    | 33.75        |
| Yearly | R   | 0.71     | 0.84         | 0.76     | 0.78         |

|     |        |      |       |       |
|-----|--------|------|-------|-------|
| NMB | -12.11 | 8.51 | -6.00 | 21.70 |
|-----|--------|------|-------|-------|

**Table S6. Seasonal and yearly mean primary PM emissions (g/s) before (a priori) and after (a posteriori) the primary PM emissions adjustments (the emissions adjustments using the AHI AOD and GOCI-AHI fused AOD) over the modeling domain during the study period 2019. The primary PM emissions here indicate the total amount of all primary PM species listed in Table S2.**

25

|                                       |                               | MAM    | JJA    | SON   | DJF    | Yearly |
|---------------------------------------|-------------------------------|--------|--------|-------|--------|--------|
| Emissions adjusted using AHI AOD      | A priori                      | 13.45  | 11.90  | 12.35 | 15.19  | 13.22  |
|                                       | A posteriori                  | 21.19  | 21.61  | 19.55 | 31.79  | 23.53  |
|                                       | Difference (post - prior) (%) | 57.54  | 81.62  | 58.27 | 109.30 | 76.68  |
| Emissions adjusted using GOCI-AHI AOD | A priori                      | 13.45  | 11.90  | 12.35 | 15.19  | 13.22  |
|                                       | A posteriori                  | 28.28  | 28.91  | 23.16 | 33.08  | 28.36  |
|                                       | Difference (post - prior) (%) | 110.30 | 142.96 | 87.54 | 117.73 | 114.63 |

**Table S7. Monthly and 3-month mean NO<sub>x</sub> emissions (tons/day) before (a priori) and after (a posteriori) the NO<sub>x</sub> emissions adjustment over the modeling domain during the study period 2022.**

|                               | MAR   | APR    | MAY   | 3-month |
|-------------------------------|-------|--------|-------|---------|
| A priori                      | 0.83  | 0.82   | 0.82  | 0.82    |
| A posteriori                  | 0.80  | 0.71   | 0.76  | 0.76    |
| Difference (post - prior) (%) | -2.83 | -13.40 | -7.33 | -7.84   |

30 **Table S8. Monthly and 3-month mean primary PM emissions (g/s) before (a priori) and after (a posteriori) the primary PM emissions adjustments (using GEMS-AMI-GOCI-2 fused AOD) over the modeling domain during the study period 2022. The primary PM emissions here indicate the total amount of all primary PM species listed in Table S2.**

|                               | MAR    | APR   | MAY   | 3-month |
|-------------------------------|--------|-------|-------|---------|
| A priori                      | 14.61  | 12.80 | 12.61 | 13.34   |
| A posteriori                  | 10.35  | 13.67 | 12.38 | 12.14   |
| Difference (post - prior) (%) | -29.17 | 6.86  | -1.81 | -9.03   |

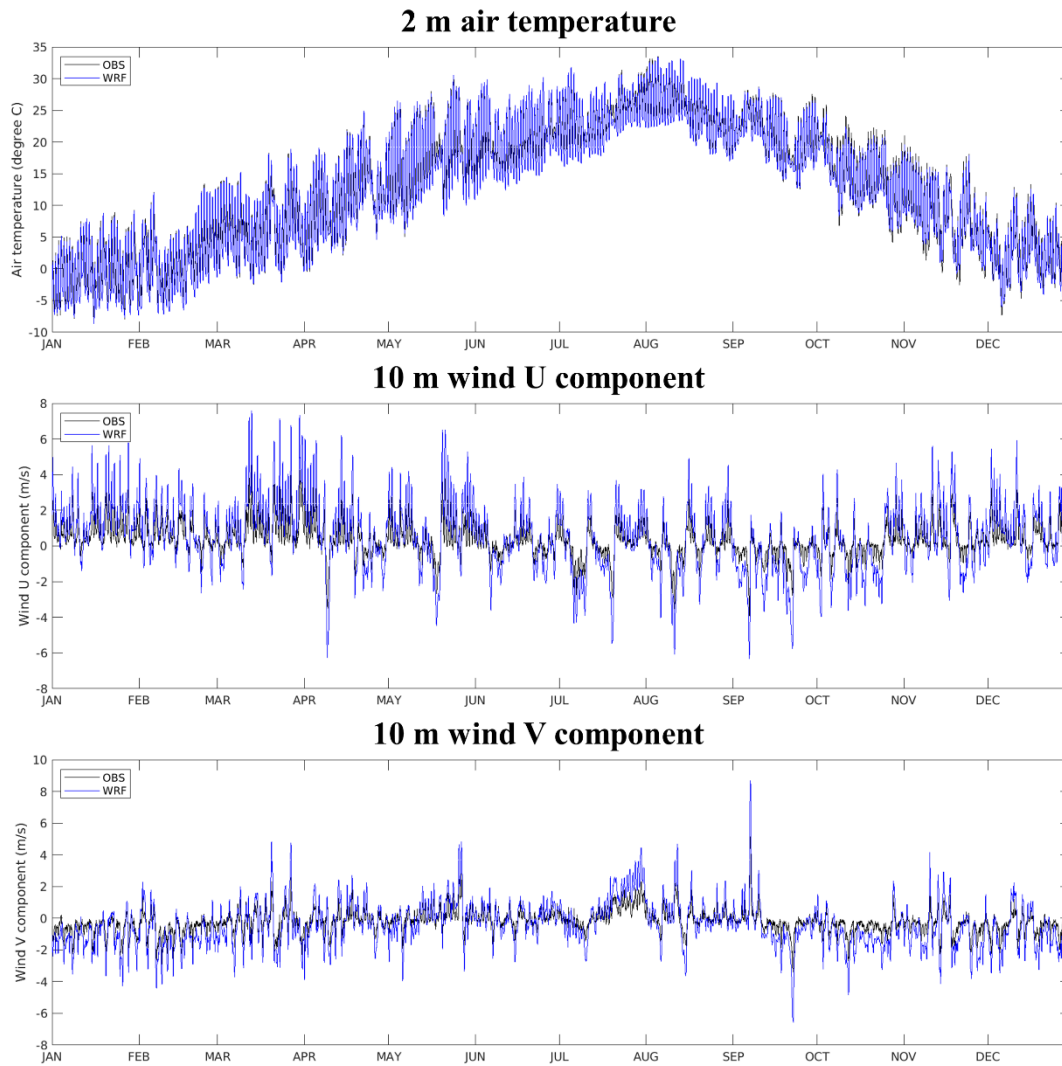

35 **Figure S1. Time-series comparisons between WRF-simulated hourly meteorological fields (2 m air temperatures (°C) and 10 m wind U and V components (m/s)) and ground-based in-situ measurements in Korea during the study period 2019 (132 sites). OBS: ground-based in-situ measurements, WRF: WRF-simulated meteorological fields.**

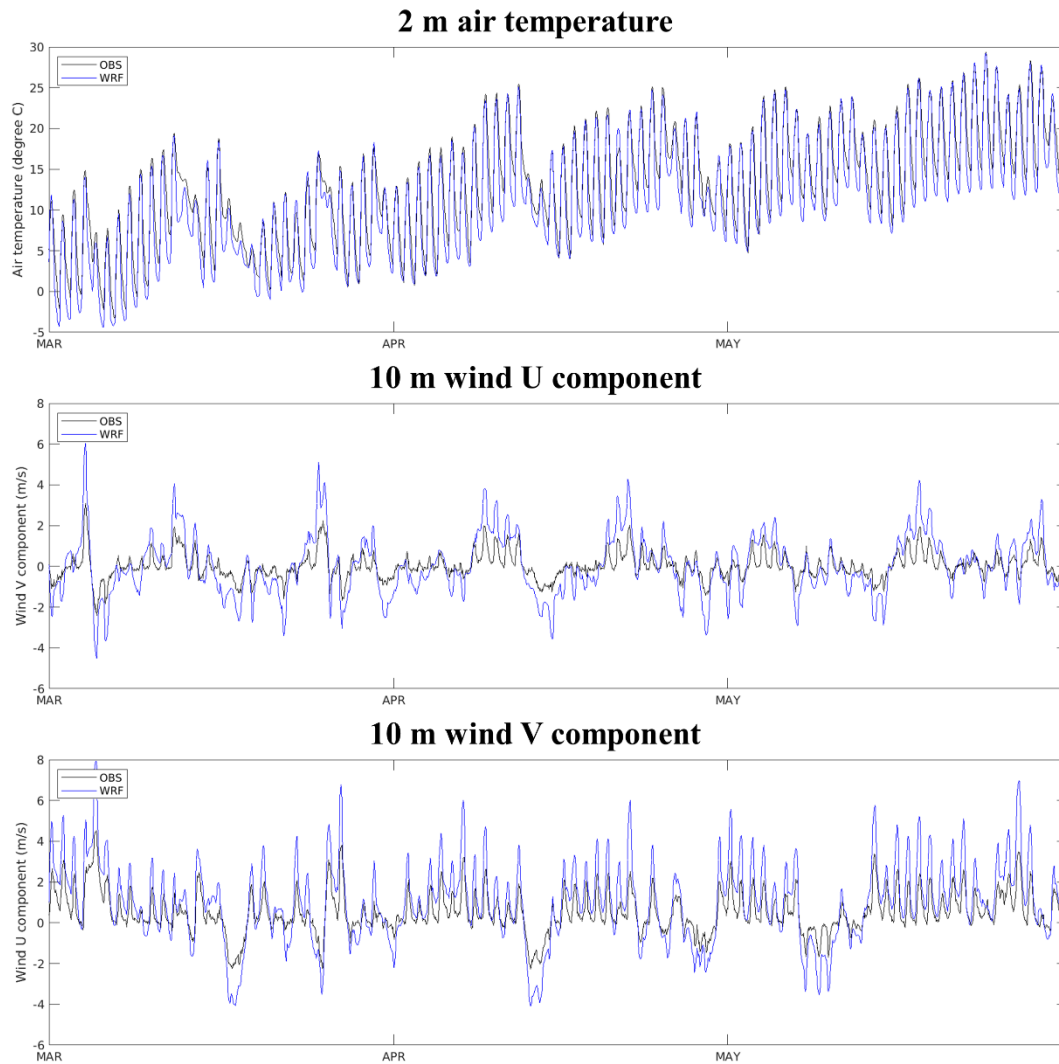

40 **Figure S2. Time-series comparisons between WRF-simulated hourly meteorological fields (2 m air temperatures (°C) and 10 m wind U and V components (m/s)) and ground-based in-situ measurements in Korea during the study period 2022 (95 sites). OBS: ground-based in-situ measurements, WRF: WRF-simulated meteorological fields.**

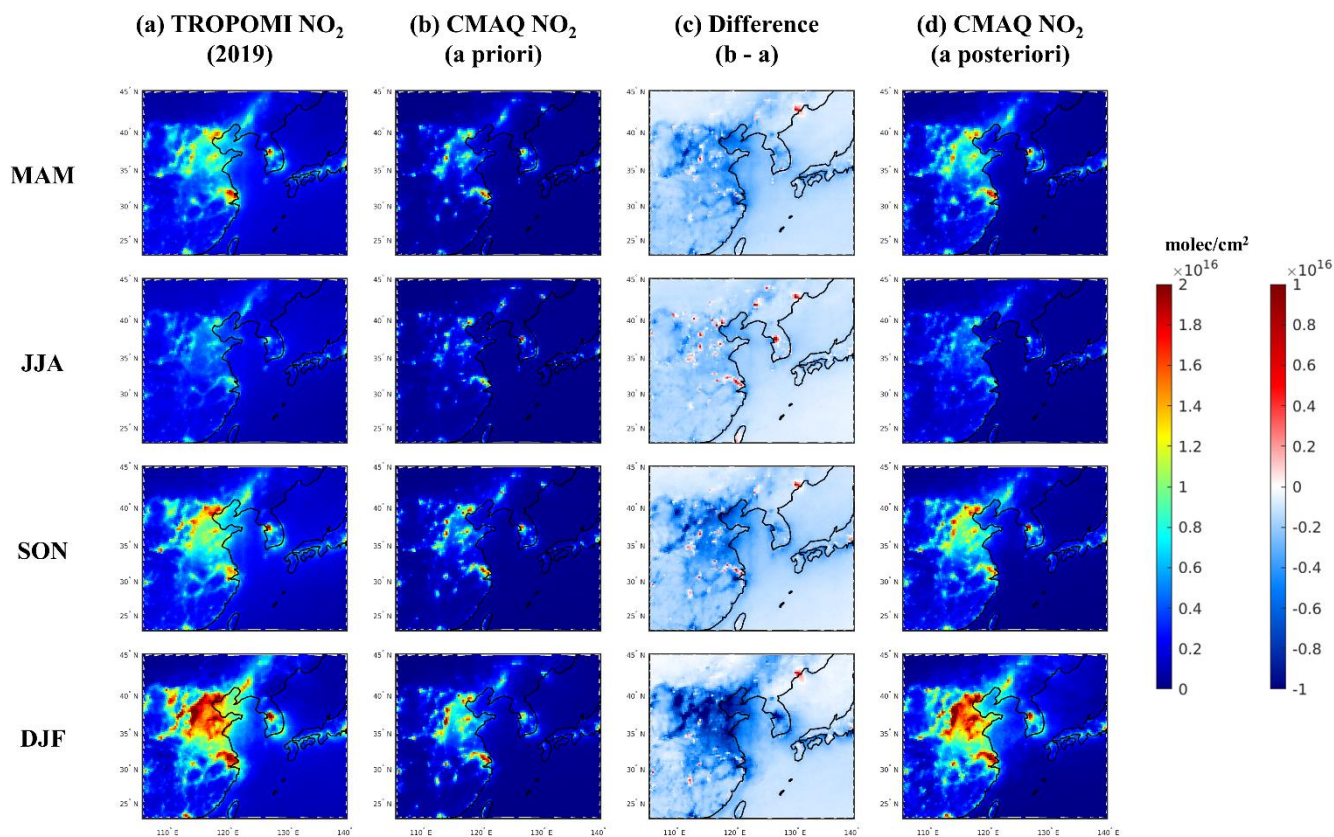

45 **Figure S3. Spatial distributions of (a) TROPOMI NO<sub>2</sub> columns (molec/cm<sup>2</sup>) and CMAQ-simulated NO<sub>2</sub> columns (b) before and (d) after the NO<sub>x</sub> emissions adjustment during the study period 2019. MAM: March, April, and May; JJA: June, July, and August; SON: September, October, and November; DJF: December, January, and February.**



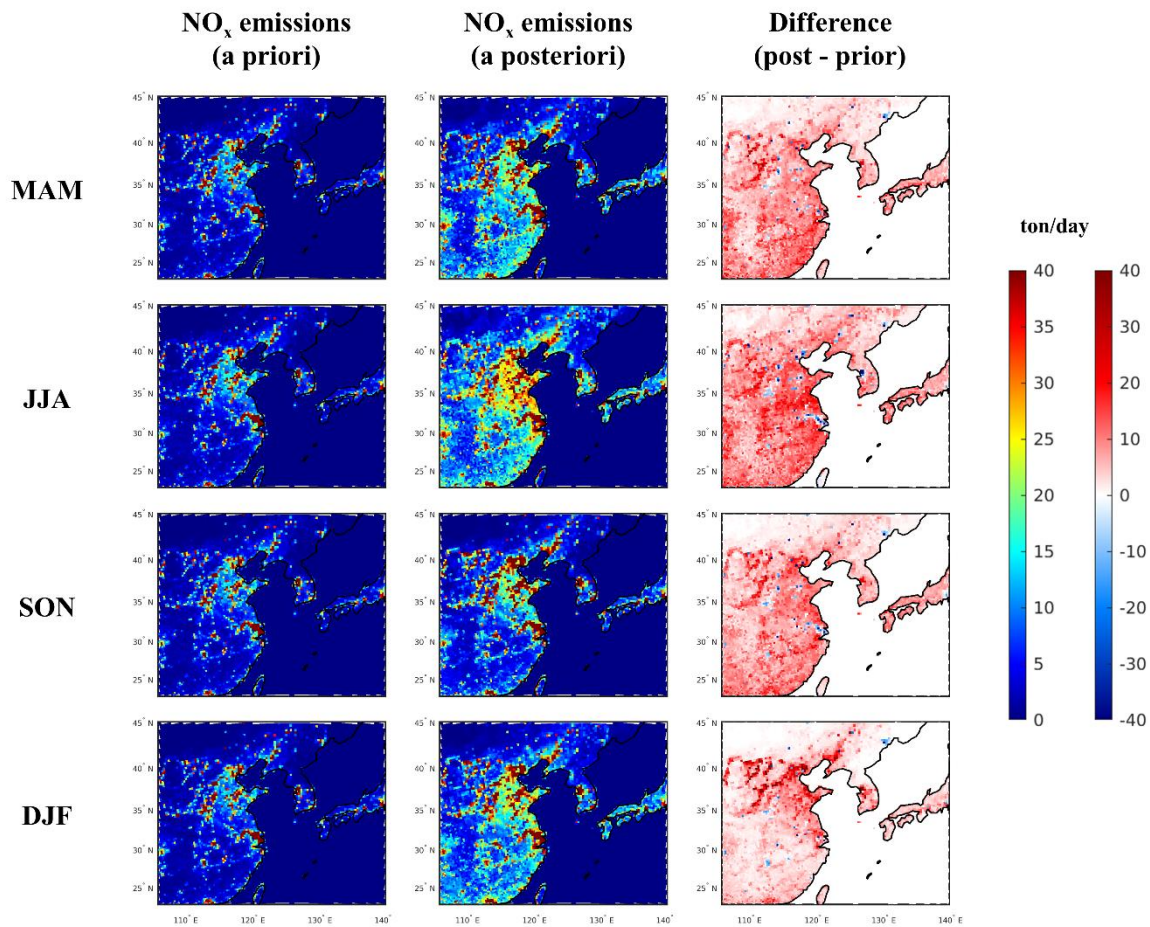

50 **Figure S4. Spatial distributions of the bottom-up estimates of NO<sub>x</sub> emissions (ton/day) before (a priori) and after (a posteriori) the NO<sub>x</sub> emissions adjustment during the study period 2019.**

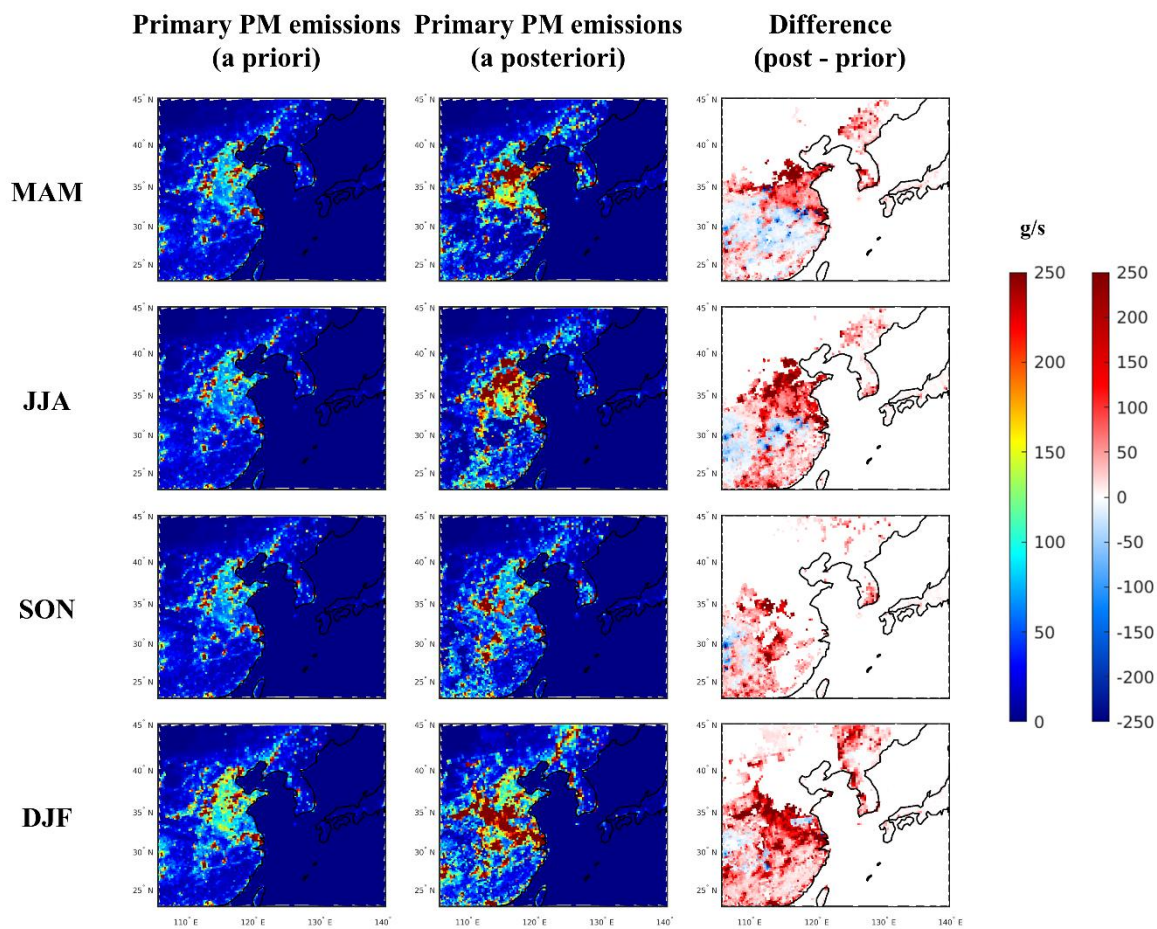

55 **Figure S5. Spatial distributions of TROPOMI NO<sub>2</sub> columns and CMAQ-simulated NO<sub>2</sub> columns before (a priori) and after (a posteriori) the NO<sub>x</sub> emissions adjustment during the study period 2019. MAM: March, April, and May; JJA: June, July, and August; SON: September, October, and November; and DJF: December, January, and February.**

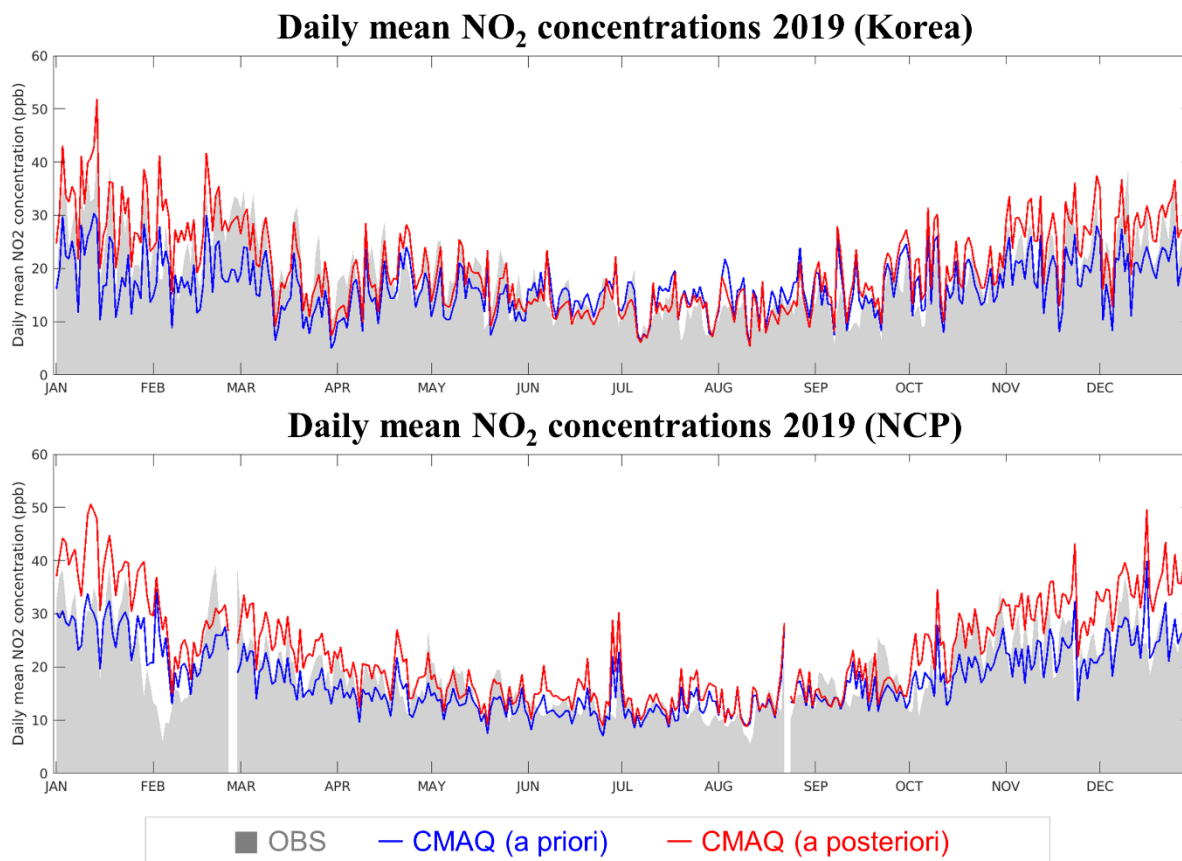

60 **Figure S6.** Comparisons of the time-series of the CMAQ-simulated daily mean surface NO<sub>2</sub> concentrations (ppb) before (a priori) and after (a posteriori) the NO<sub>x</sub> emission adjustment and the ground-based in-situ measurements in Korea (346 AirKorea sites) and the NCP region (235 MEE sites) during the study period 2019. OBS: ground-based in-situ measurements.

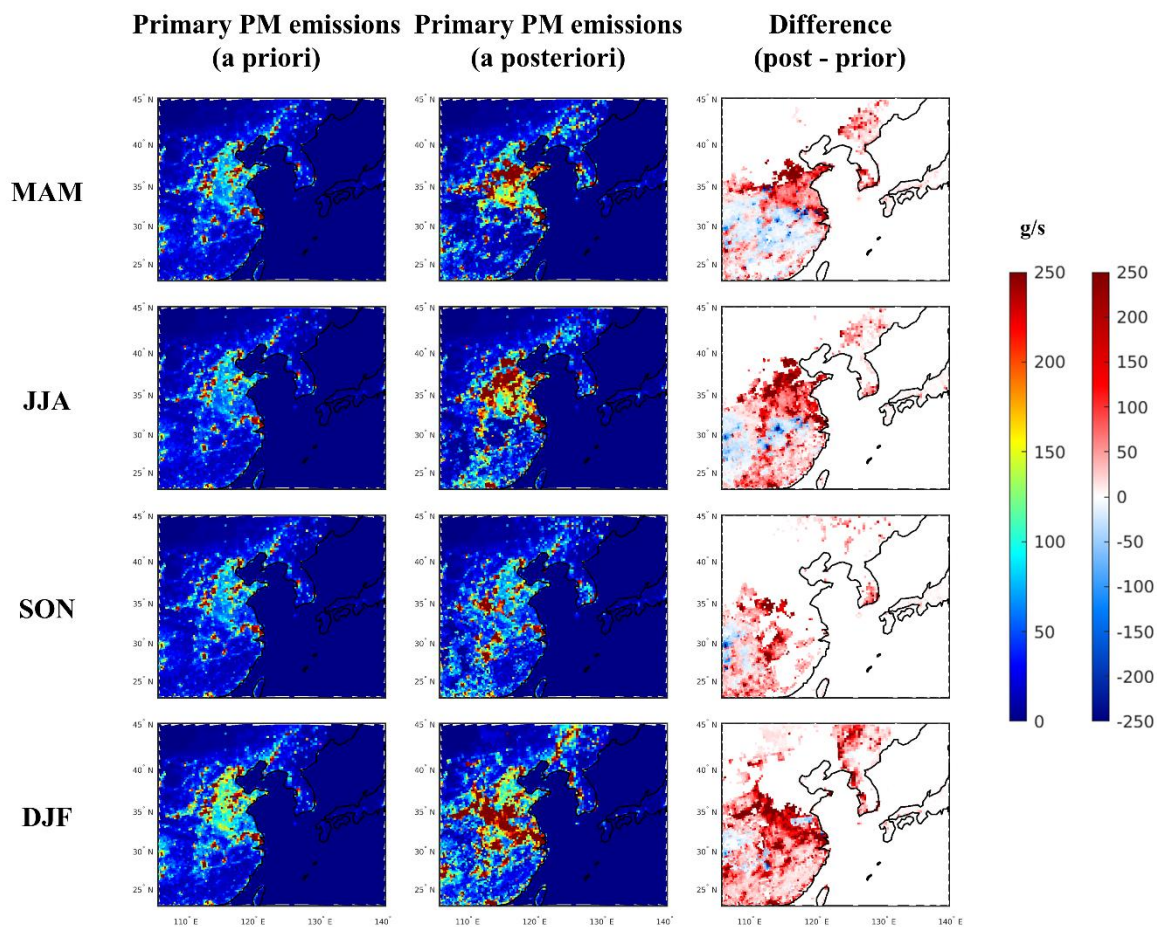

65 **Figure S7. Spatial distributions of the bottom-up estimates of primary PM emissions (g/s) before (a priori) and after (a posteriori) the primary PM emissions adjustment (using the AHI AOD) during the study period 2019. The primary PM emissions here indicate the total amount of all primary PM species listed in Table S2.**



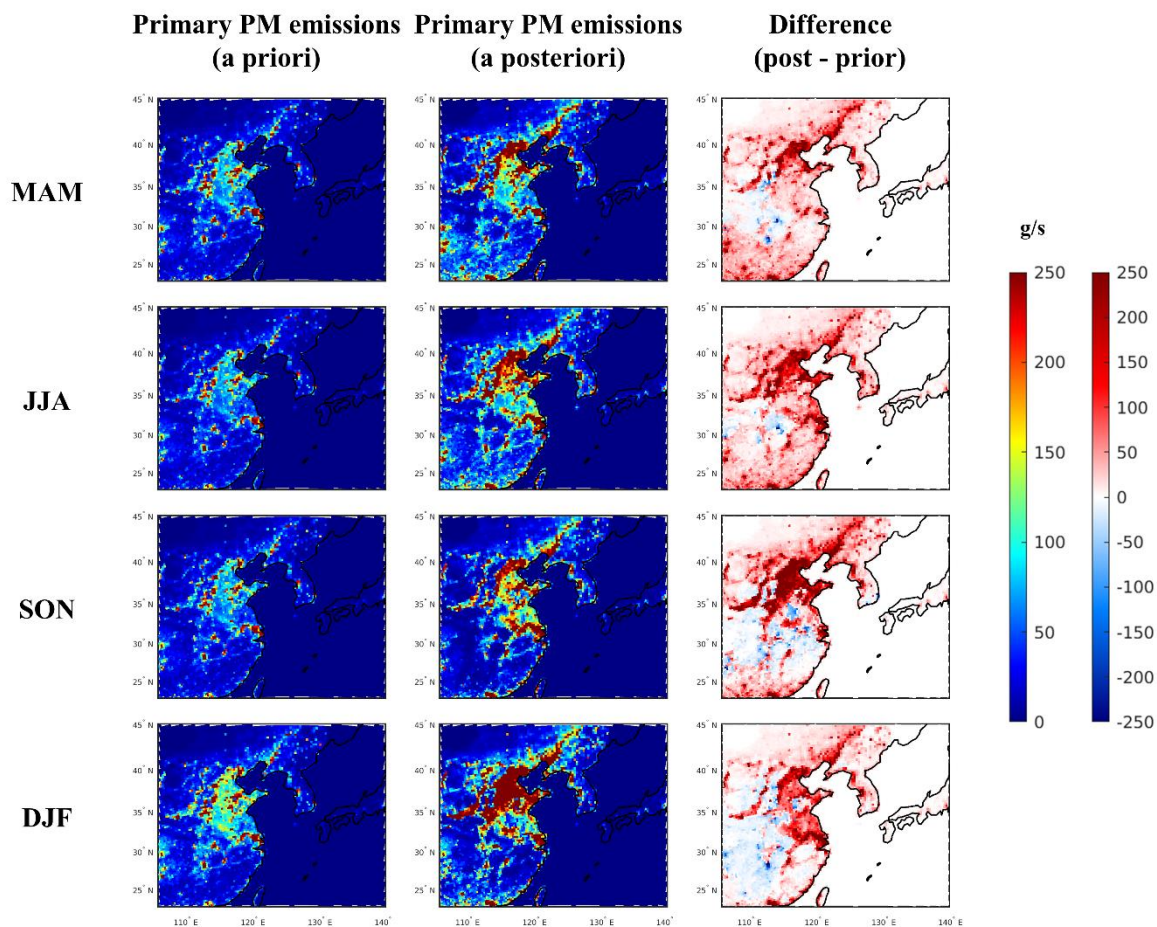

70 **Figure S8. Spatial distributions of the bottom-up estimates of primary PM emissions (g/s) before (a priori) and after (a posteriori) the primary PM emissions adjustment (using GOCI-AHI fused AOD) during the study period 2019. The primary PM emissions here indicate the total amount of all primary PM species listed in Table S2.**

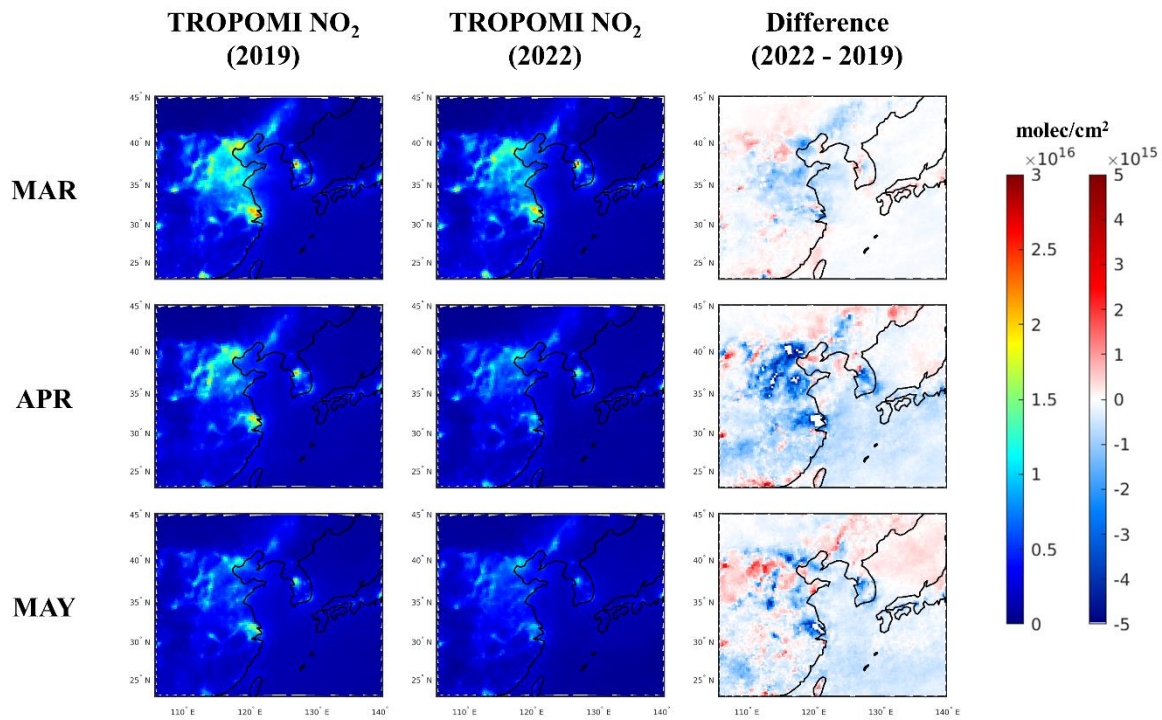

75 Figure S9. Spatial distributions of TROPOMI NO<sub>2</sub> columns (molec/cm<sup>2</sup>) in March, April, and May 2019 and 2022.

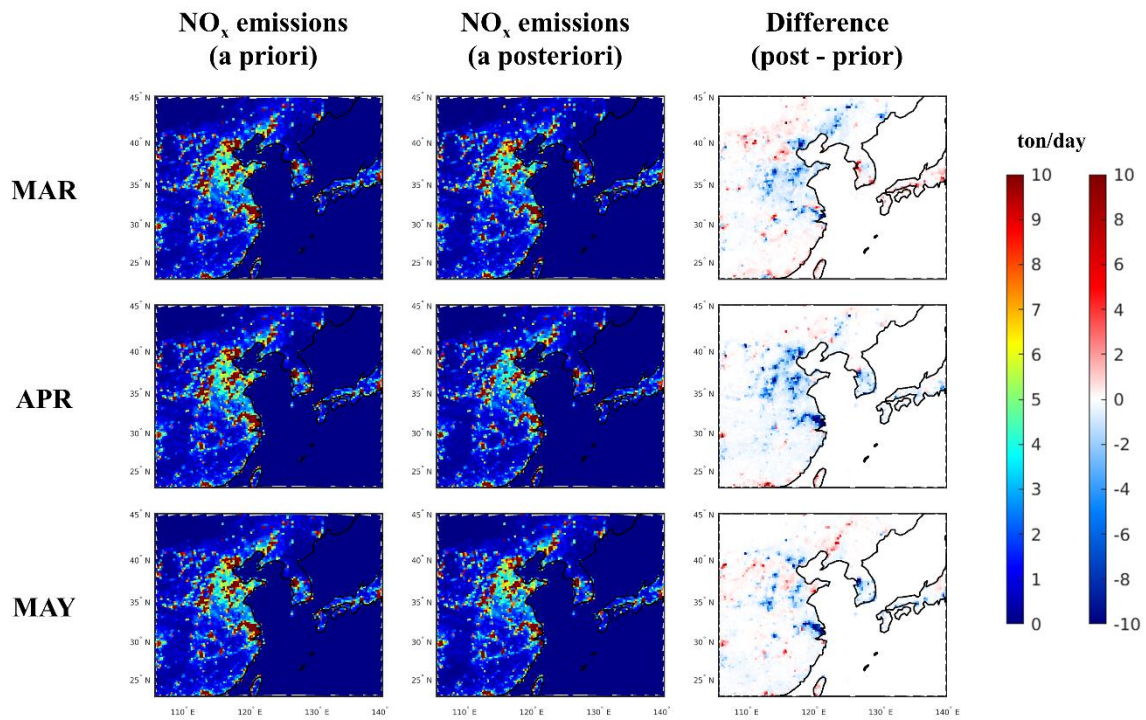

**Figure S10. Spatial distributions of the bottom-up estimates of NO<sub>x</sub> emissions (ton/day) before (a priori) and after (a posteriori) the NO<sub>x</sub> emissions adjustment during the study period 2022.**

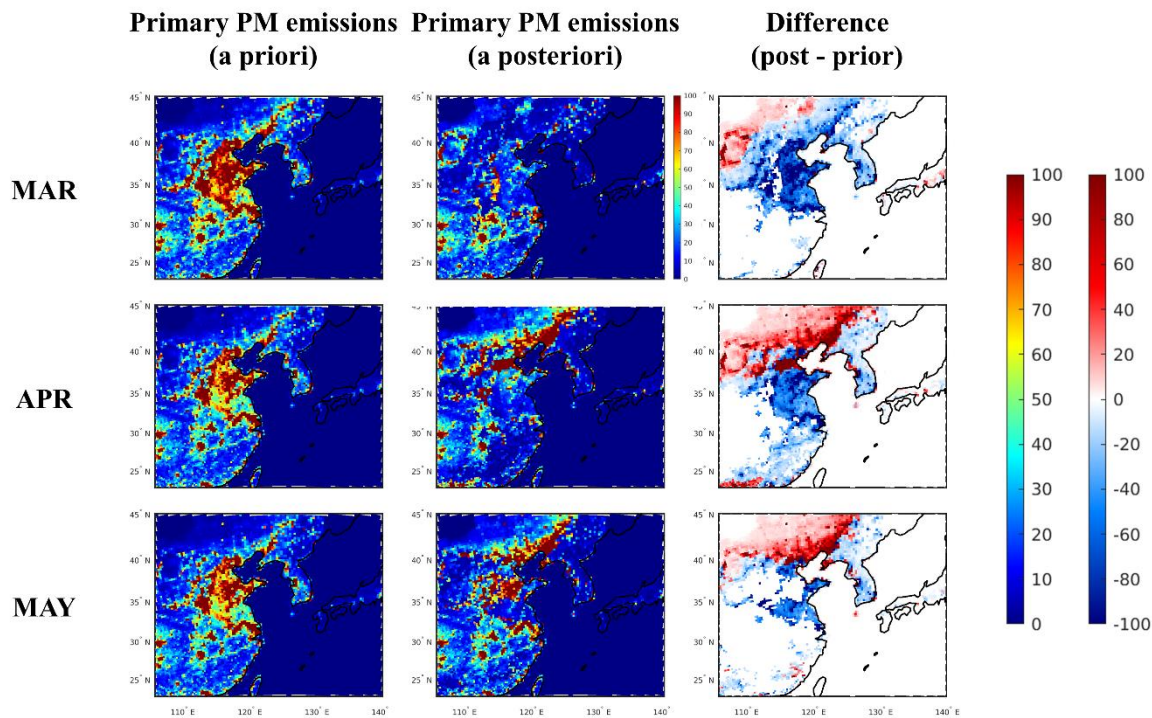

Figure S11. Spatial distributions of the bottom-up estimates of primary PM emissions (g/s) before (a priori) and after (a posteriori) the primary PM emissions adjustment (using GEMS-AMI-GOCI-2 fused AOD) during the study period 2022. The primary PM emissions here indicate the total amount of all primary PM species listed in Table S2.



## References

- Carter, W. P. L.: Development of the SAPRC-07 chemical mechanism. *Atmos. Environ.*, 44(40), 5324–5335, <https://doi.org/10.1016/j.atmosenv.2010.01.026>, 2010.
- 90 Clough, S. A., Shephard, M. W., Mlawer, J. E., Delamere, J. S., Iacono, M. J., Cady-Pereira, K., et al.: Atmospheric radiative transfer modeling: A summary of the AER codes. *J. Quant. Spectrosc. Ra.*, 91(2), 233–244, <https://doi.org/10.1016/j.jqsrt.2004.05.058>, 2005.
- Iacono, M. J., Delamere, J. S., Mlawer, E. J., Shephard, M. W., Clough, S. A., and Collins, W. D.: Radiative forcing by long-lived greenhouse gases: Calculations with the AER radiative transfer models. *J. Geophys. Res.*, 113, D13103, <https://doi.org/10.1029/2008JD009944>, 2008.
- 95 Jeon, W., Choi, Y., Lee, H. W., Lee, S.-H., Yoo, J.-W., Park, J., and Lee, H.-J.: A quantitative analysis of grid nudging effect on each process of PM<sub>2.5</sub> production in the Korean Peninsula. *Atmos. Environ.*, 122, 763–774, <https://doi.org/10.1016/j.atmosenv.2015.10.050>, 2015.
- Kain, J. S.: The Kain–Fritsch Convective Parameterization: An Update. *J. Appl. Meteorol. Clim.*, 43(1), 170–181, [https://doi.org/10.1175/1520-0450\(2004\)043<0170:TKCPAU>2.0.CO;2](https://doi.org/10.1175/1520-0450(2004)043<0170:TKCPAU>2.0.CO;2), 2004.
- 100 Morrison, H., Thompson, G., and Tatarskii, V. Impact of cloud microphysics on the development of trailing stratiform precipitation in a simulated squall line: Comparison of one- and two-moment schemes. *Mon. Weather. Rev.*, 137(3), 991–1007, <https://doi.org/10.1175/2008MWR2556.1>, 2009.
- Pleim, J. E., Xiu, A., Finkelstein, P. L., and Otte, T. L.: A Coupled Land-Surface and Dry Deposition Model and Comparison to Field Measurements of Surface Heat, Moisture, and Ozone Fluxes. *Water, Air and Soil Pollution: Focus*, 105 1(5), 243–252, <https://doi.org/10.1023/A:1013123725860>, 2001.
- Pleim, J. E.: A Simple, Efficient Solution of Flux–Profile Relationships in the Atmospheric Surface Layer. *J. Appl. Meteorol. Clim.*, 45(2), 341–347, <https://doi.org/10.1175/JAM2339.1>, 2006.
- Pleim, J. E.: A Combined Local and Nonlocal Closure Model for the Atmospheric Boundary Layer. Part I: Model Description and Testing. *J. Appl. Meteorol. Clim.*, 46(9), 1383–1395, <https://doi.org/10.1175/JAM2539.1>, 2007a.
- 110 Pleim, J. E.: A Combined Local and Nonlocal Closure Model for the Atmospheric Boundary Layer. Part II: Application and Evaluation in a Mesoscale Meteorological Model. *J. Appl. Meteorol. Clim.*, 46(9), 1396–1409, <https://doi.org/10.1175/JAM2534.1>, 2007b.
- Simon, H.: CMAQv5.0 PMother speciation. Community Multiscale Air Quality (CMAQ) Model Wiki, [https://www.airqualitymodeling.org/index.php/CMAQv5.0\\_PMother\\_speciation](https://www.airqualitymodeling.org/index.php/CMAQv5.0_PMother_speciation) (Accessed 15 July 2022), 2015.
- 115 Xiu, A., and Pleim, J. E.: Development of a Land Surface Model. Part I: Application in a Mesoscale Meteorological Model. *J. Appl. Meteorol. Clim.*, 40(2), 192–209, [https://doi.org/10.1175/1520-0450\(2001\)040<0192:DOALSM>2.0.CO;2](https://doi.org/10.1175/1520-0450(2001)040<0192:DOALSM>2.0.CO;2), 2001.
